# Supplementary material for: TBAI-mediated electrochemical oxidative synthesis of quinazolin-4(3 H )-ones from 2-aminobenzamides and isothiocyanates
Source: Royal Society of Chemistry journal article supplement (doi:10.1039/d5ob00410a), 2025-01-01

The SI for *Org. Biomol. Chem.*, 2025, **23**, 4860–4865, DOI: 10.1039/ D5OB00410A, originally published on 21st April 2025, was updated on 27th May 2025. This version corrects an error in the structure of compound **3qa**.

## Product mass spectrometry information

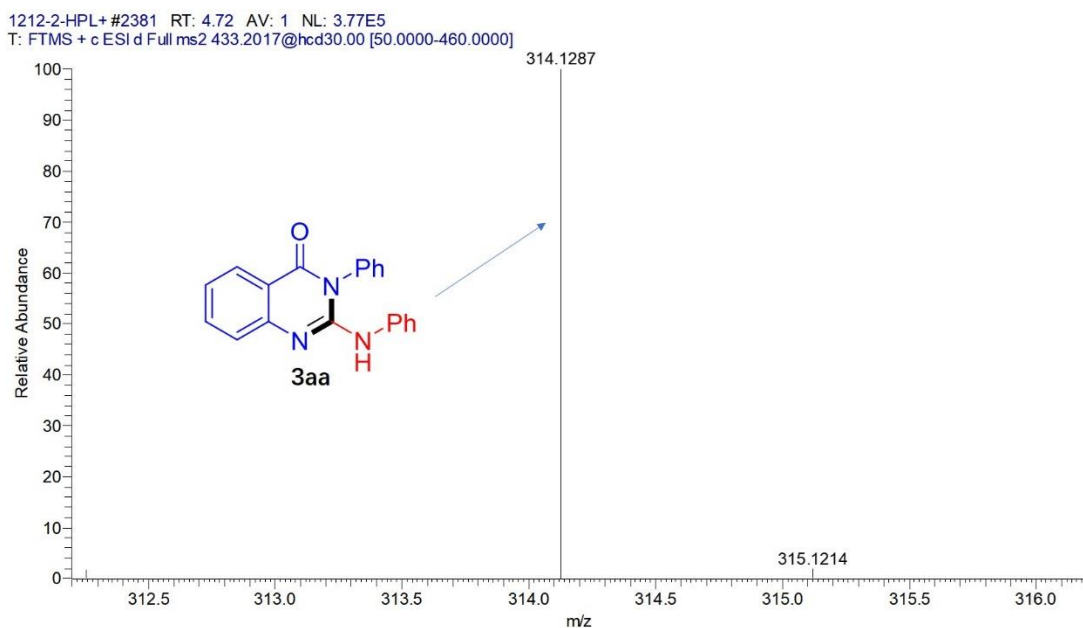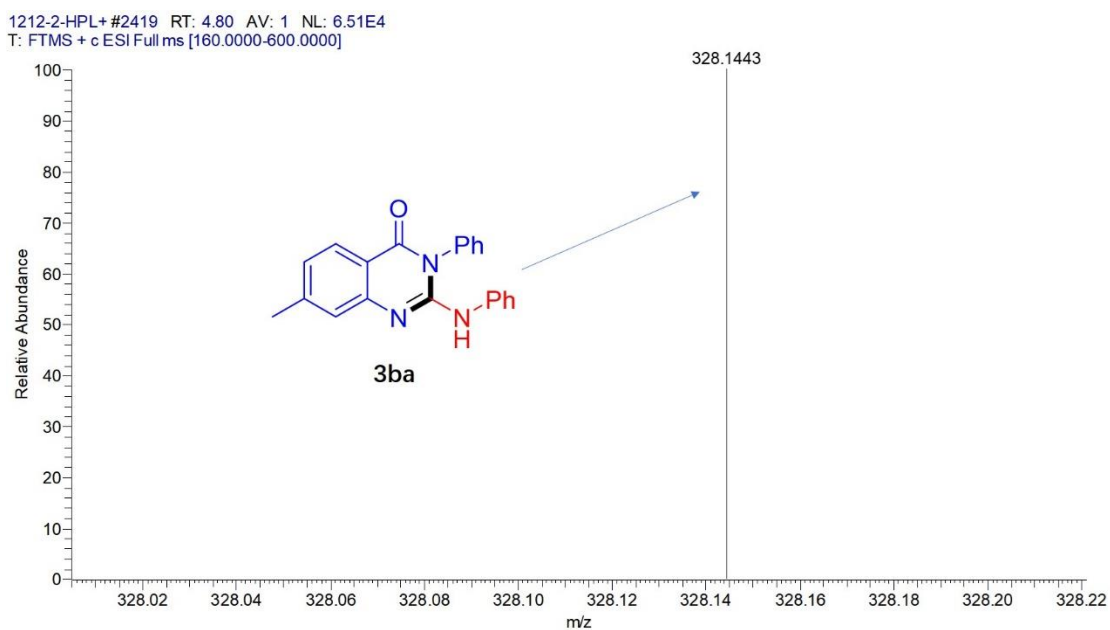

1212-2-HPL+ #2419 RT: 4.80 AV: 1 NL: 2.87E6  
T: FTMS + c ESI Full ms [160.0000-600.0000]

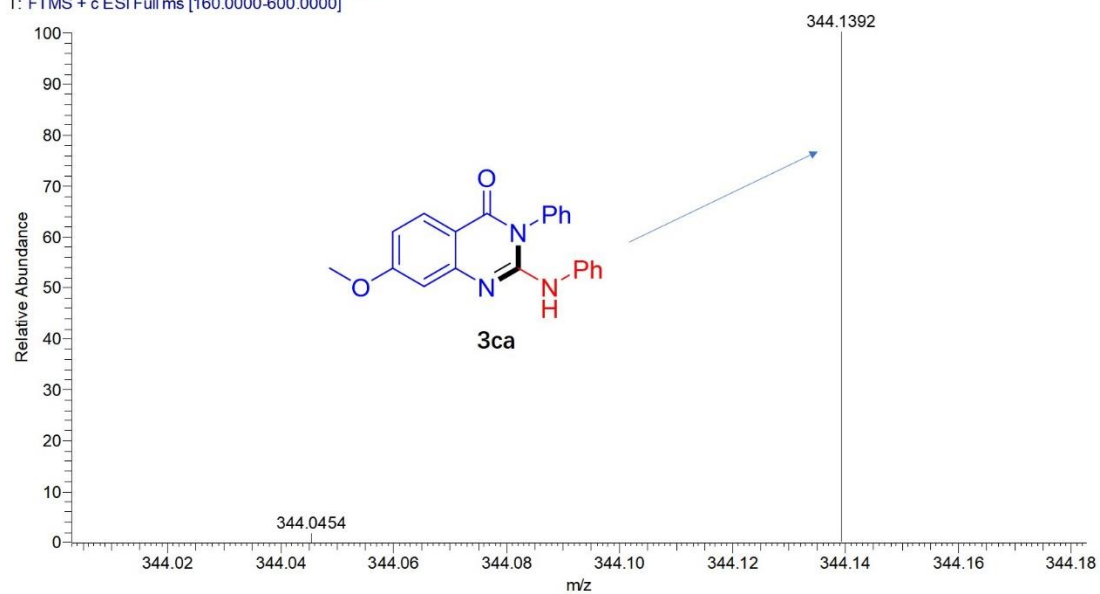

1212-2-HPL+ #2344 RT: 4.65 AV: 1 NL: 4.74E4  
T: FTMS + c ESI d Full ms2 330.1334@hcd30.00 [50.0000-355.0000]

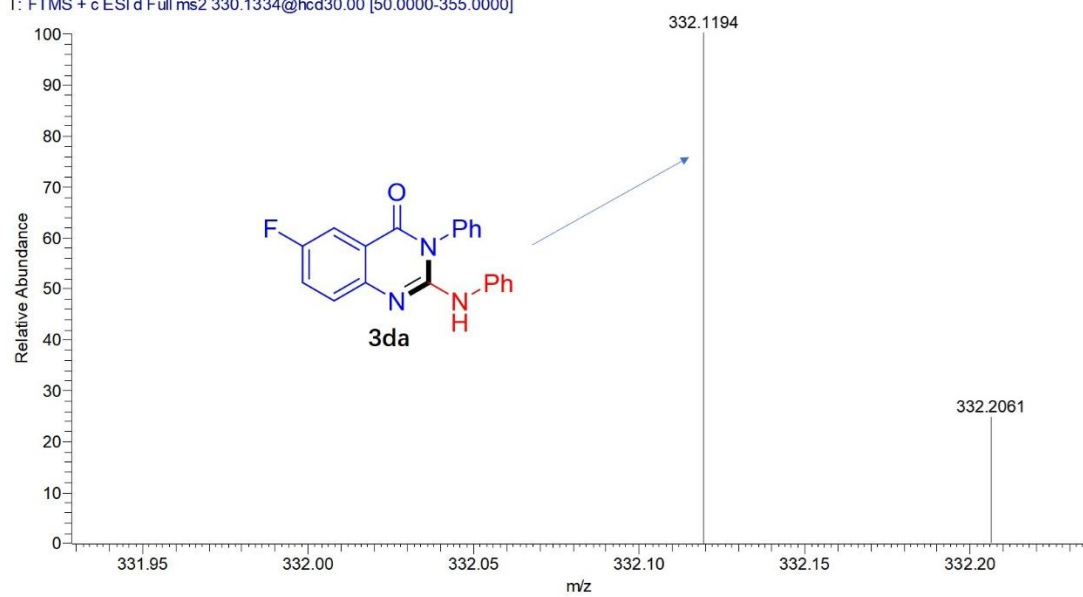

1212-2-HPL+ #2815 RT: 5.57 AV: 1 NL: 5.32E8  
T: FTMS + c ESI Full ms [160.0000-600.0000]

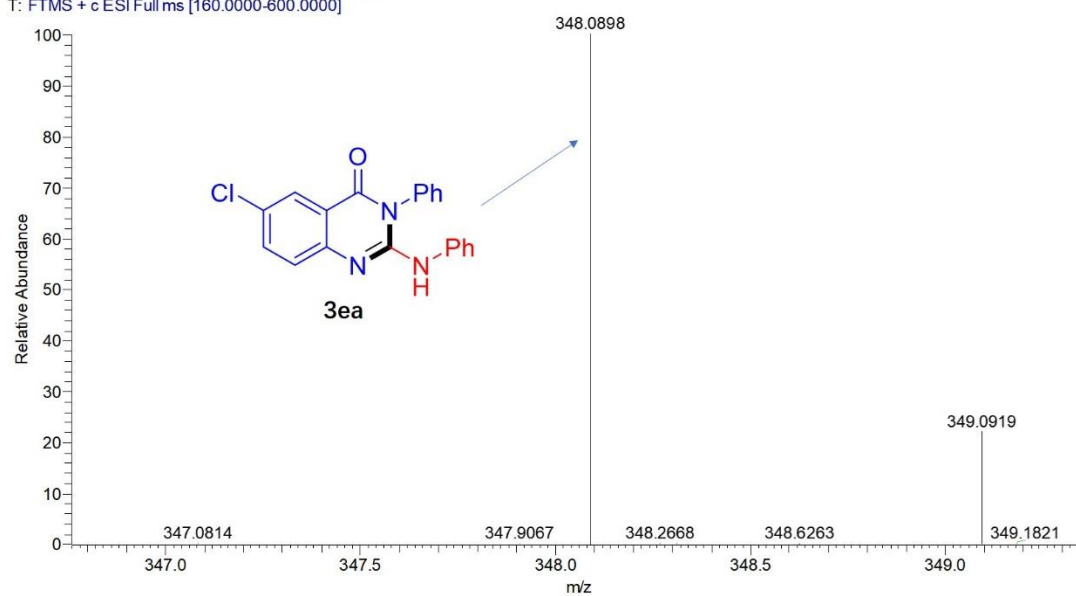

1212-2-HPL+ #2815 RT: 5.57 AV: 1 NL: 8.54E6  
T: FTMS + c ESI Full ms [160.0000-600.0000]

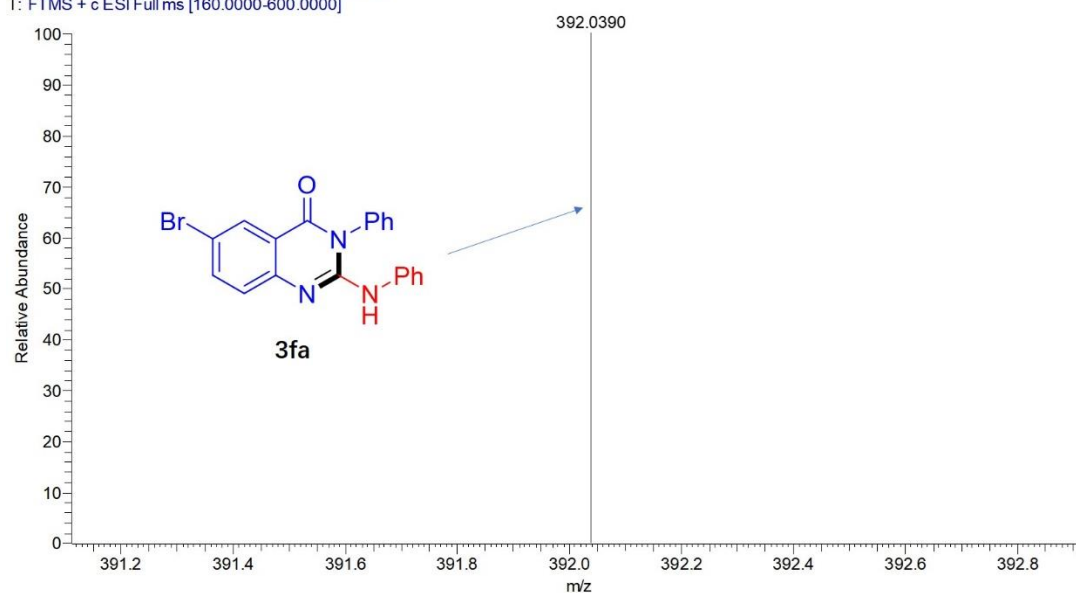

1212-2-HPL+ #2815 RT: 5.57 AV: 1 NL: 1.81E7  
T: FTMS + c ESI Full ms [160.0000-600.0000]

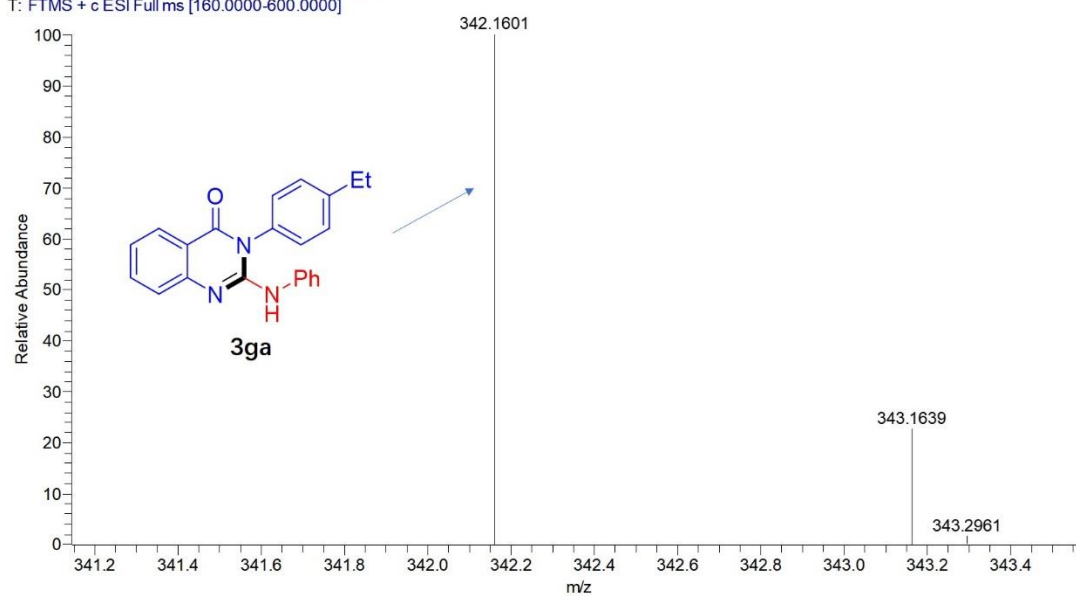

1212-2-HPL+ #2815 RT: 5.57 AV: 1 NL: 2.06E7  
T: FTMS + c ESI Full ms [160.0000-600.0000]

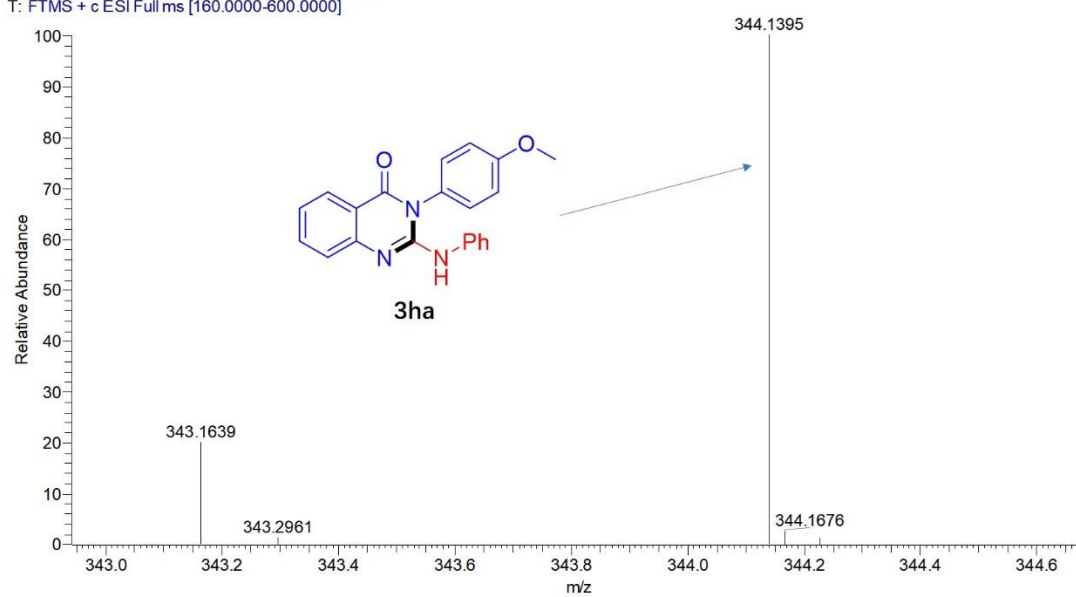

1212-2-HPL+ #2779 RT: 5.50 AV: 1 NL: 5.62E7  
T: FTMS + c ESI Full ms [160.0000-600.0000]

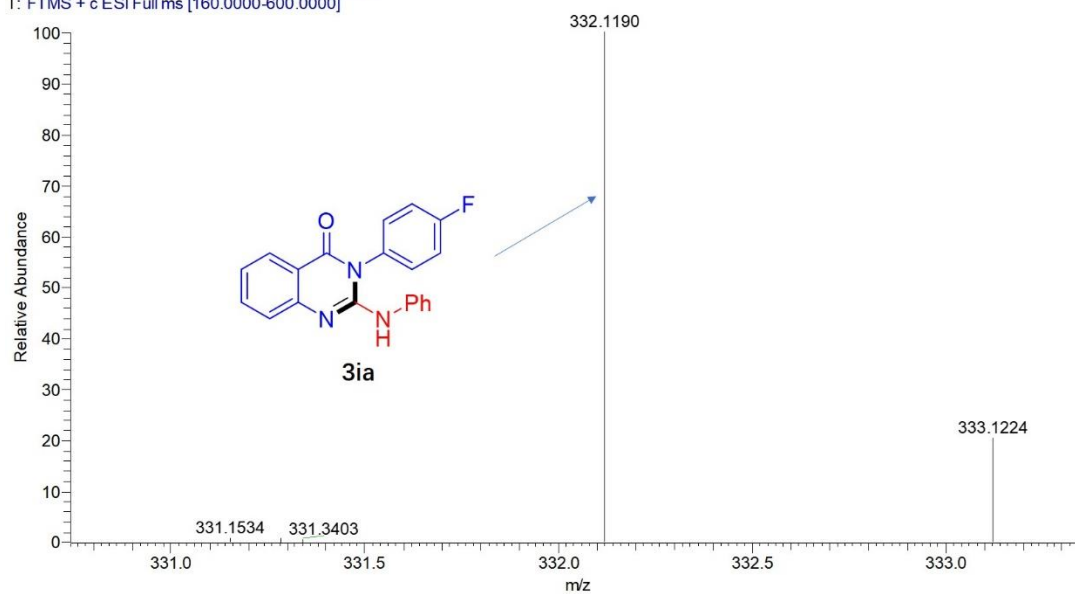

1212-2-HPL+ #2773 RT: 5.49 AV: 1 NL: 6.50E7  
T: FTMS + c ESI Full ms [160.0000-600.0000]

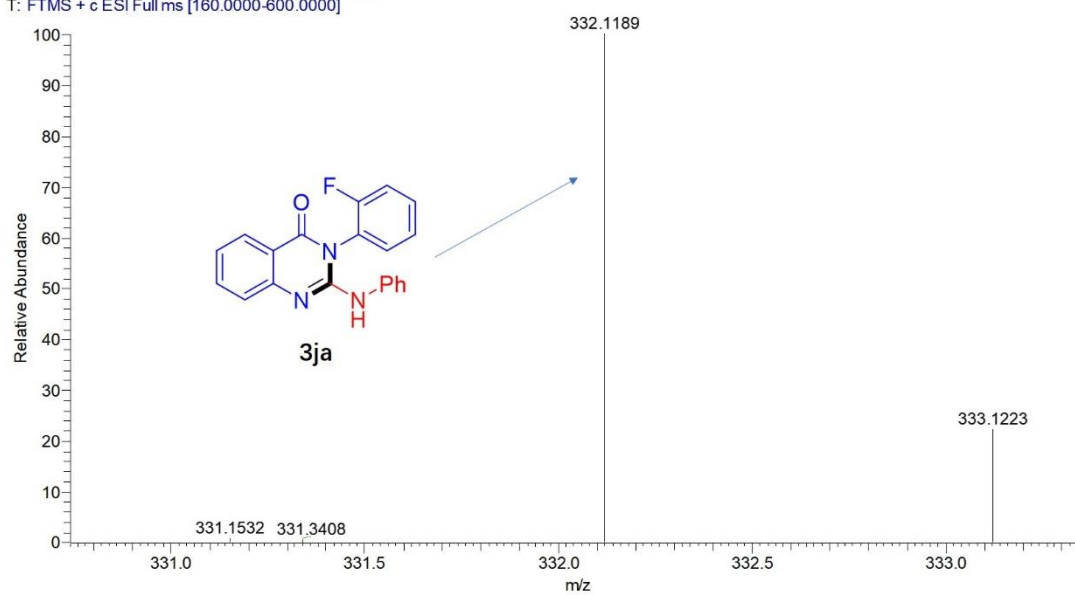

1212-2-HPL+ #2766 RT: 5.47 AV: 1 NL: 1.13E8  
T: FTMS + c ESI d Full ms2 330.3360@hcd30.00 [50.0000-695.0000]

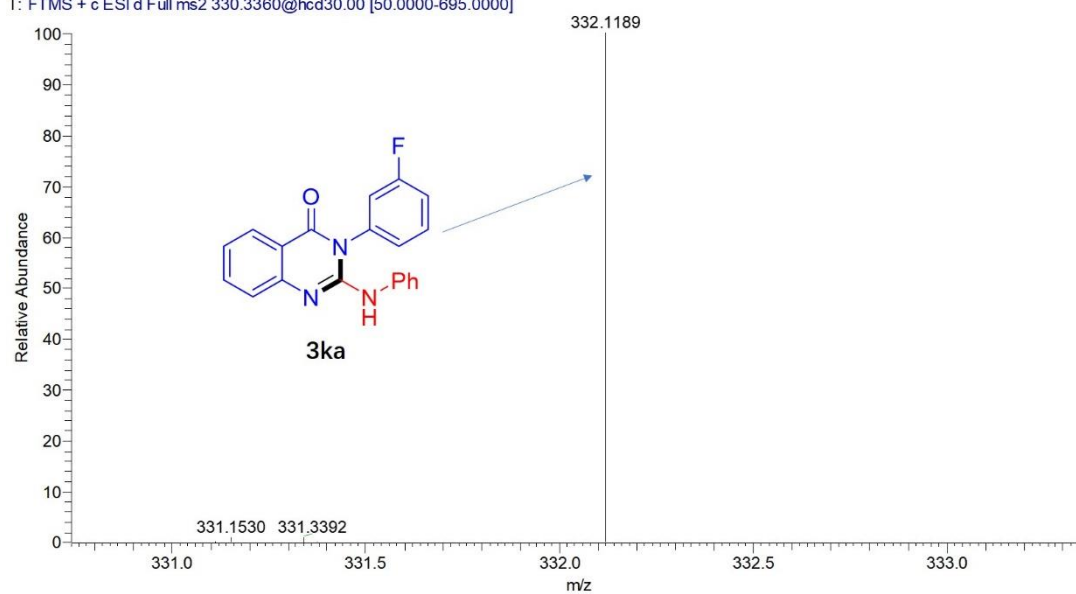

1212-2-HPL+ #2833 RT: 5.61 AV: 1 NL: 5.15E6  
T: FTMS + c ESI Full ms [160.0000-600.0000]

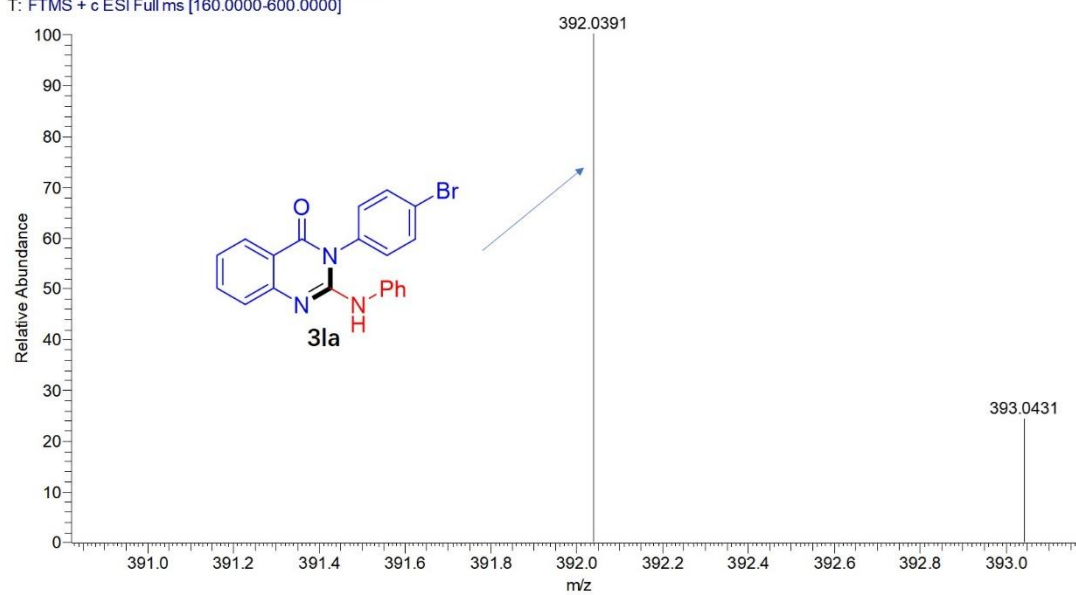

1212-2-HPL+ #2544 RT: 5.04 AV: 1 NL: 2.21E4  
T: FTMS + c ESI d Full ms2 557.1909@hcd30.00 [50.0000-590.0000]

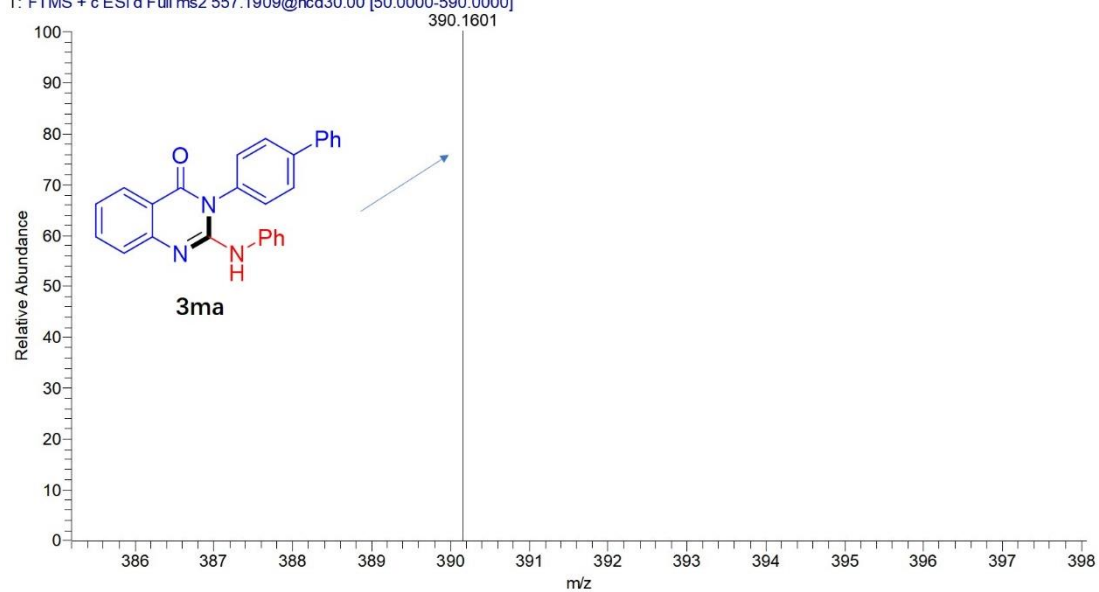

1212-2-HPL+ #2737 RT: 5.42 AV: 1 NL: 2.10E7  
T: FTMS + c ESI Full ms [160.0000-600.0000]

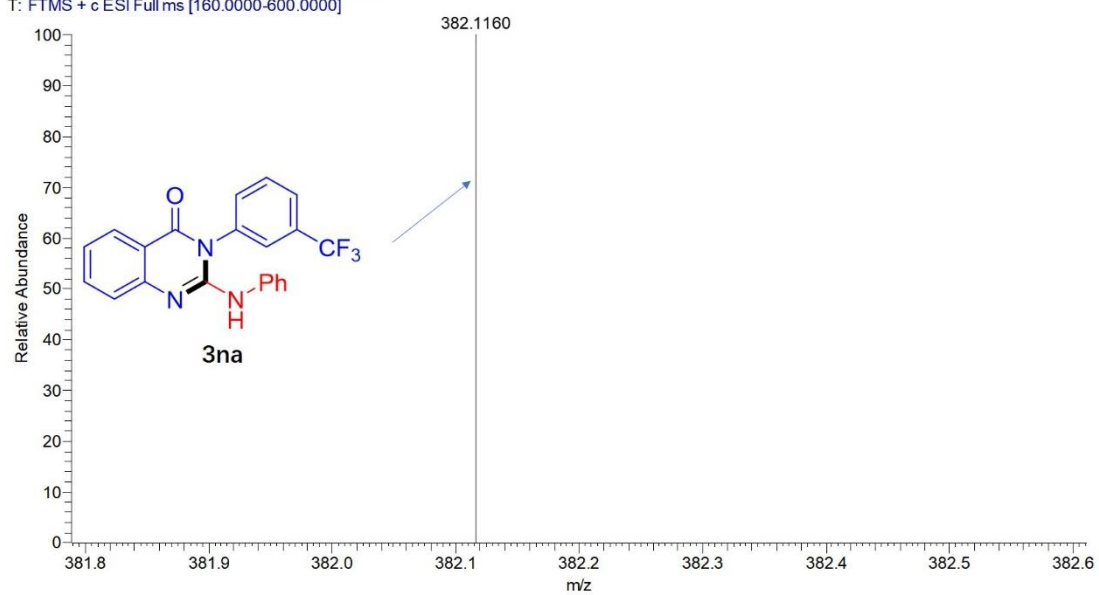

1212-2-HPL+ #2743 RT: 5.43 AV: 1 NL: 6.08E5  
T: FTMS + c ESI Full ms [160.0000-600.0000]

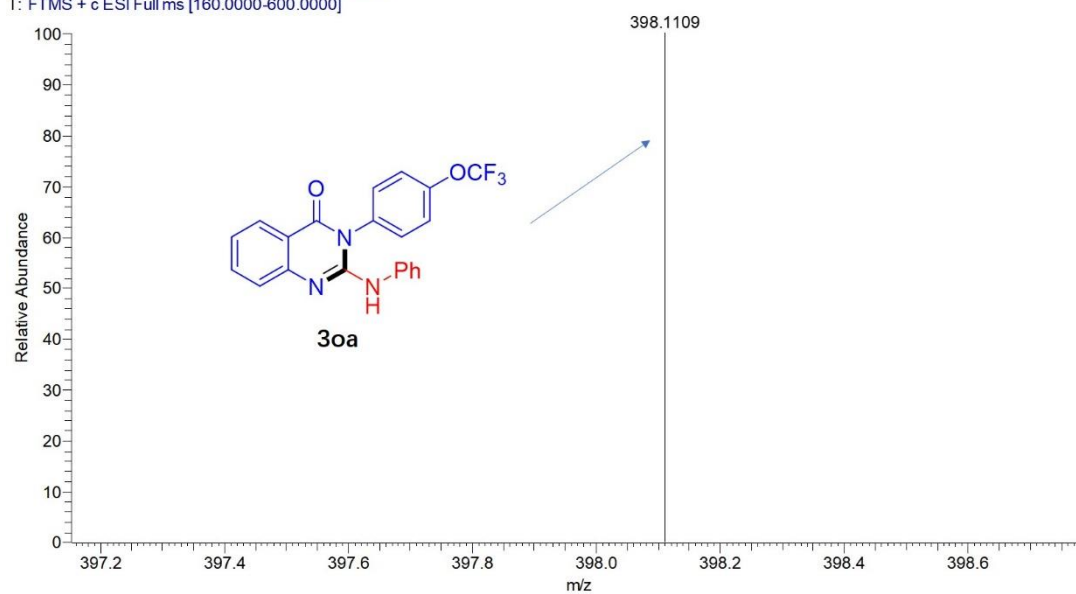

1212-2-HPL+ #2743 RT: 5.43 AV: 1 NL: 8.02E5  
T: FTMS + c ESI Full ms [160.0000-600.0000]

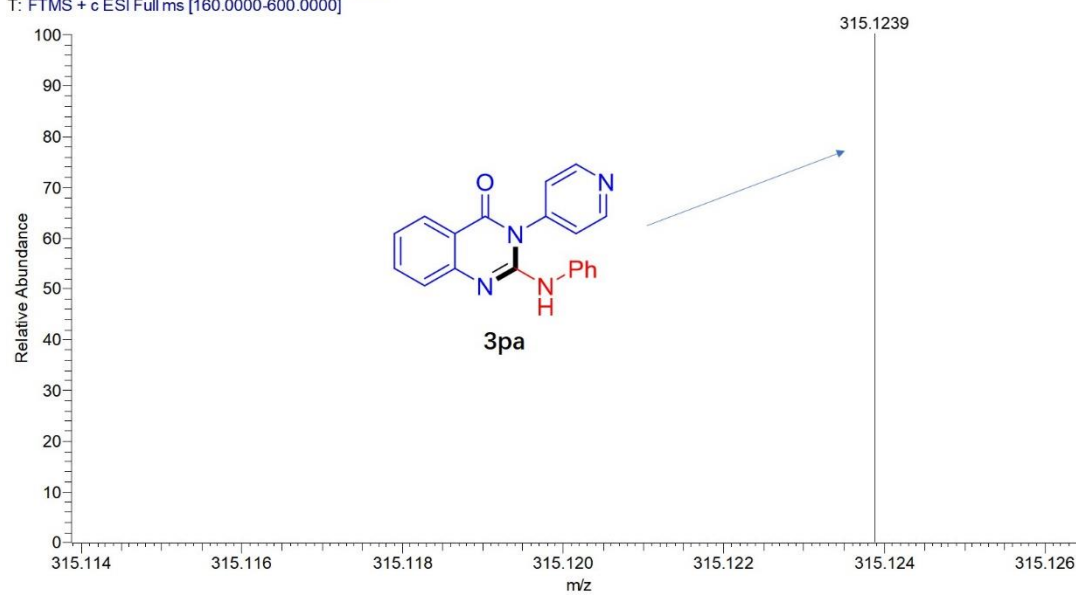



1212-2-HPL+ #2522-2857 RT: 5.01-5.65 AV: 56 NL: 1.50E7  
T: FTMS + c ESI Full ms [160.0000-600.0000]

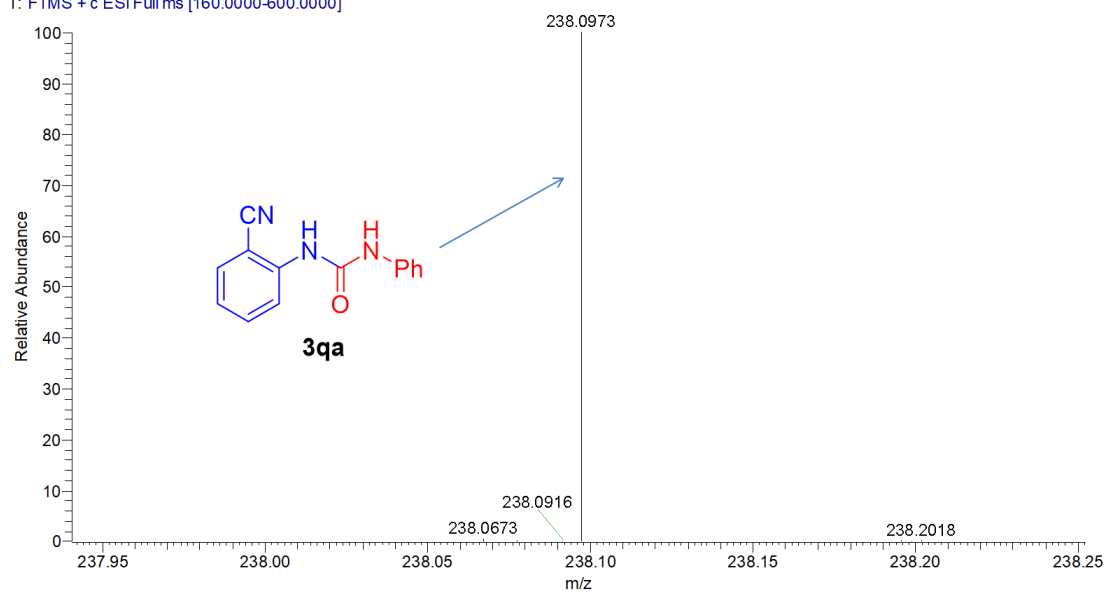

1212-2-HPL+ #2697 RT: 5.34 AV: 1 NL: 8.61E3  
T: FTMS + c ESI d Full ms2 282.0870@hcd30.00 [50.0000-305.0000]

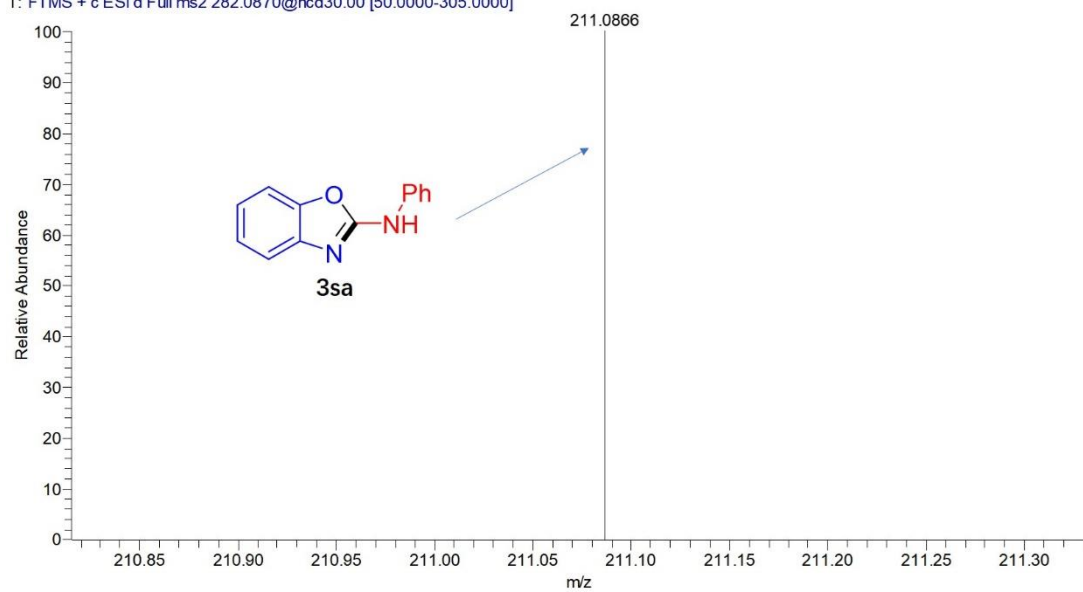

1212-2-HPL+ #3061 RT: 6.05 AV: 1 NL: 3.15E7  
T: FTMS + c ESI Full ms [160.0000-600.0000]

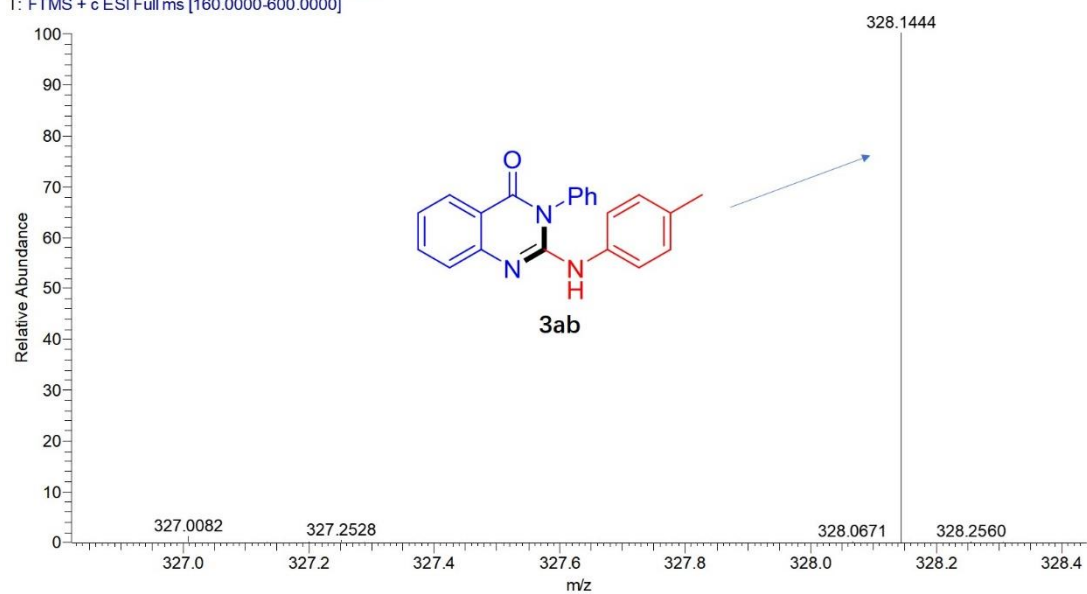

1212-2-HPL+ #3067 RT: 6.07 AV: 1 NL: 2.83E7  
T: FTMS + c ESI Full ms [160.0000-600.0000]

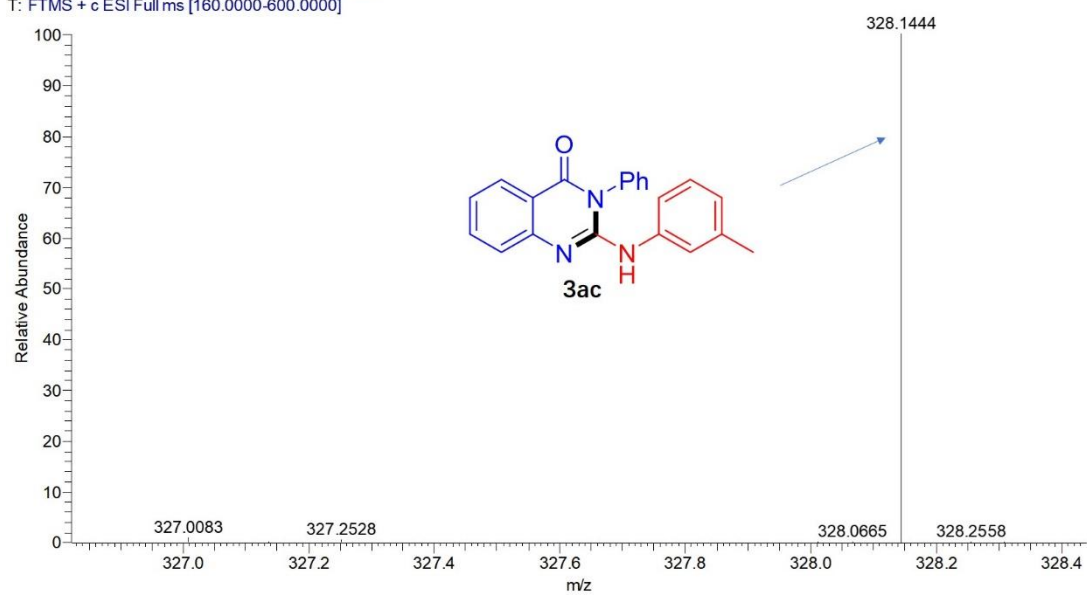

1212-2-HPL+ #3085 RT: 6.10 AV: 1 NL: 2.14E7  
T: FTMS + c ESI Full ms [160.0000-600.0000]

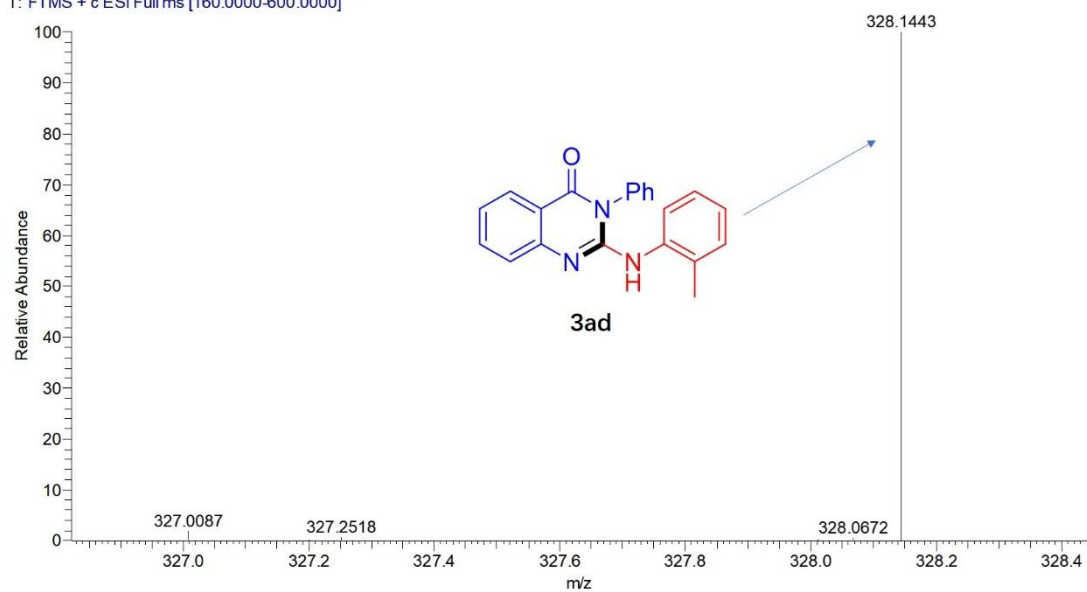

1212-2-HPL+ #2815 RT: 5.57 AV: 1 NL: 1.81E7  
T: FTMS + c ESI Full ms [160.0000-600.0000]

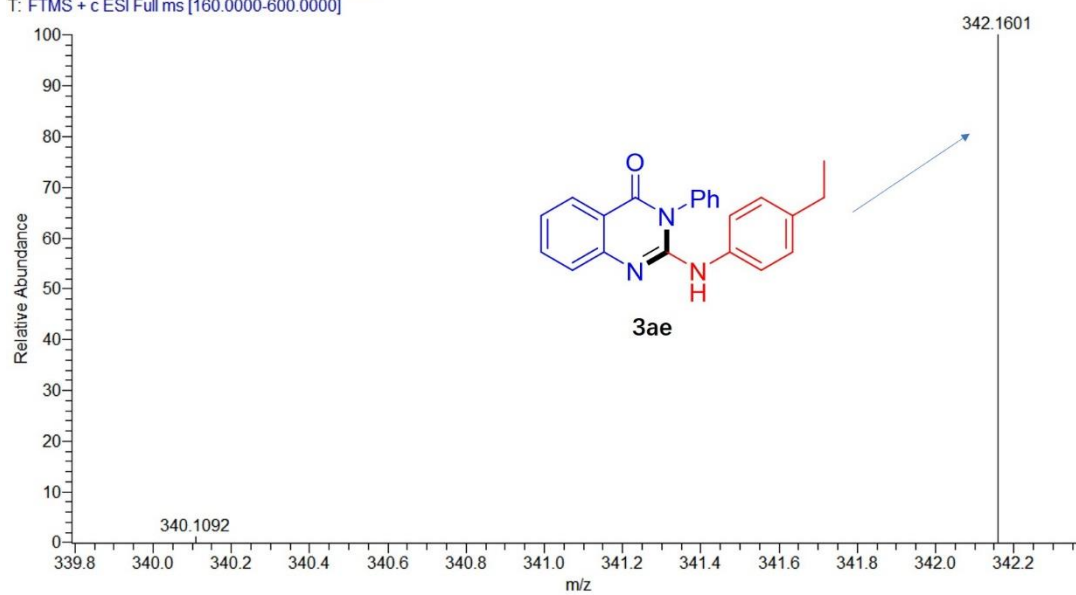

1212-2-HPL+ #3067 RT: 6.07 AV: 1 NL: 4.54E6  
T: FTMS + c ESI Full ms [160.0000-600.0000]

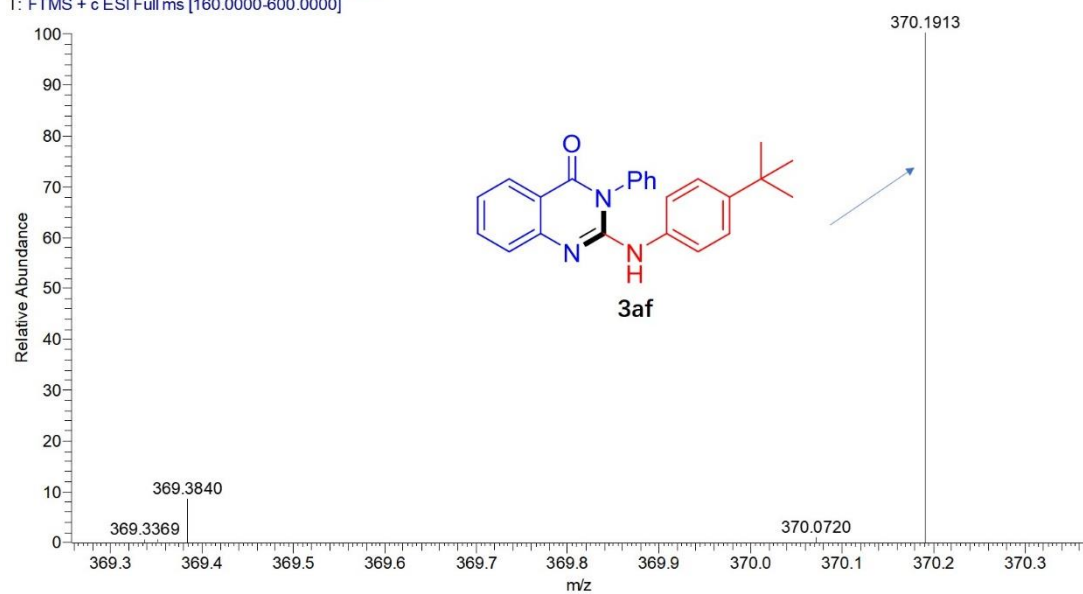

1212-2-HPL+ #3067 RT: 6.07 AV: 1 NL: 1.03E7  
T: FTMS + c ESI Full ms [160.0000-600.0000]

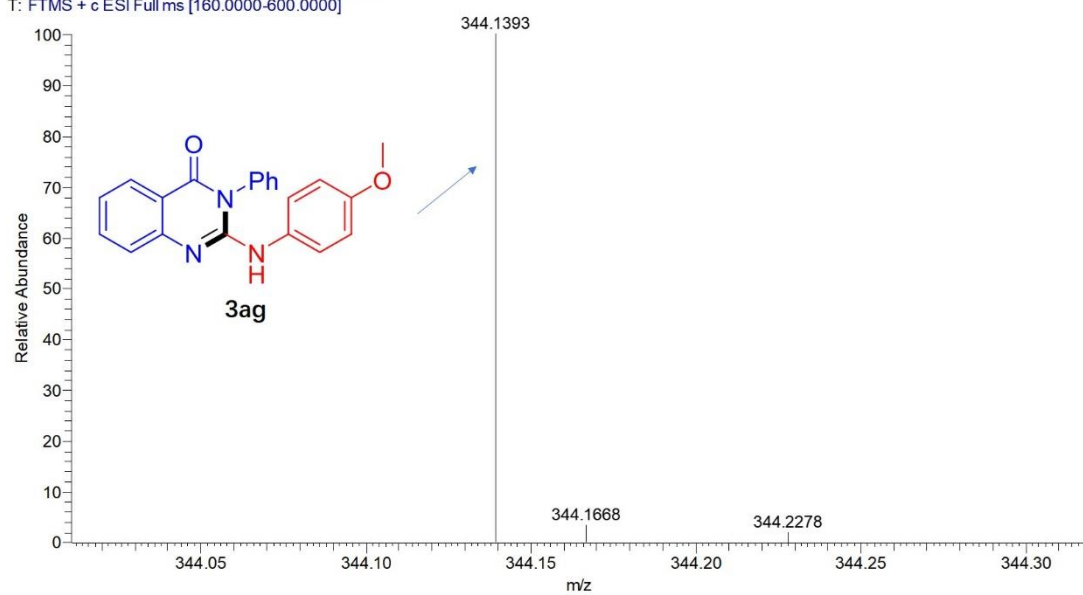

1212-2-HPL+ #3073 RT: 6.08 AV: 1 NL: 9.83E6  
T: FTMS + c ESI Full ms [160.0000-600.0000]

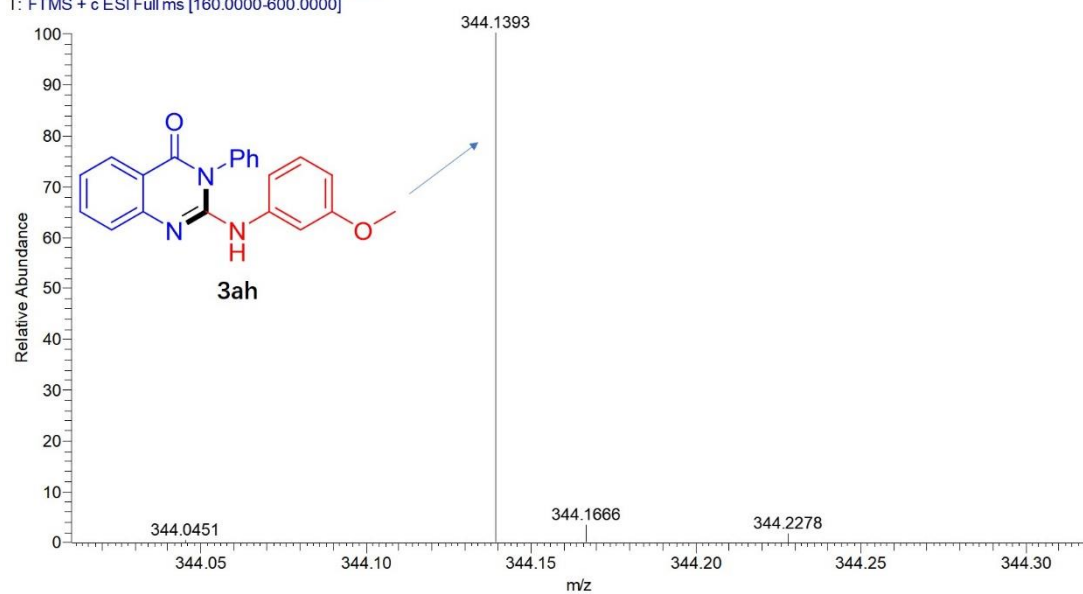

1212-2-HPL+ #3073 RT: 6.08 AV: 1 NL: 1.47E7  
T: FTMS + c ESI Full ms [160.0000-600.0000]

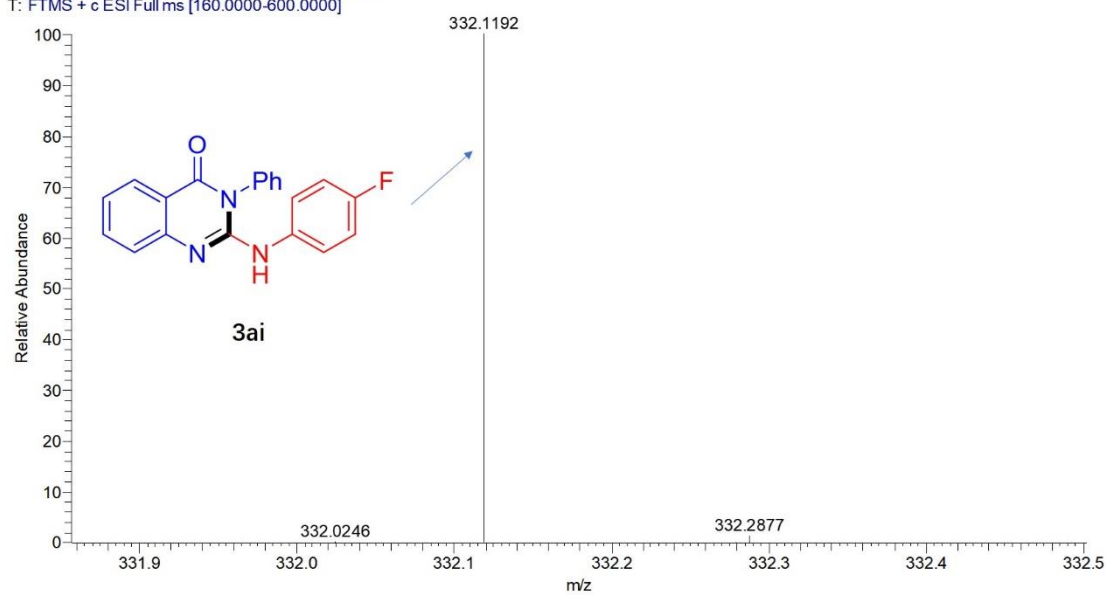

1212-2-HPL+ #3079 RT: 6.09 AV: 1 NL: 1.39E7  
T: FTMS + c ESI Full ms [160.0000-600.0000]

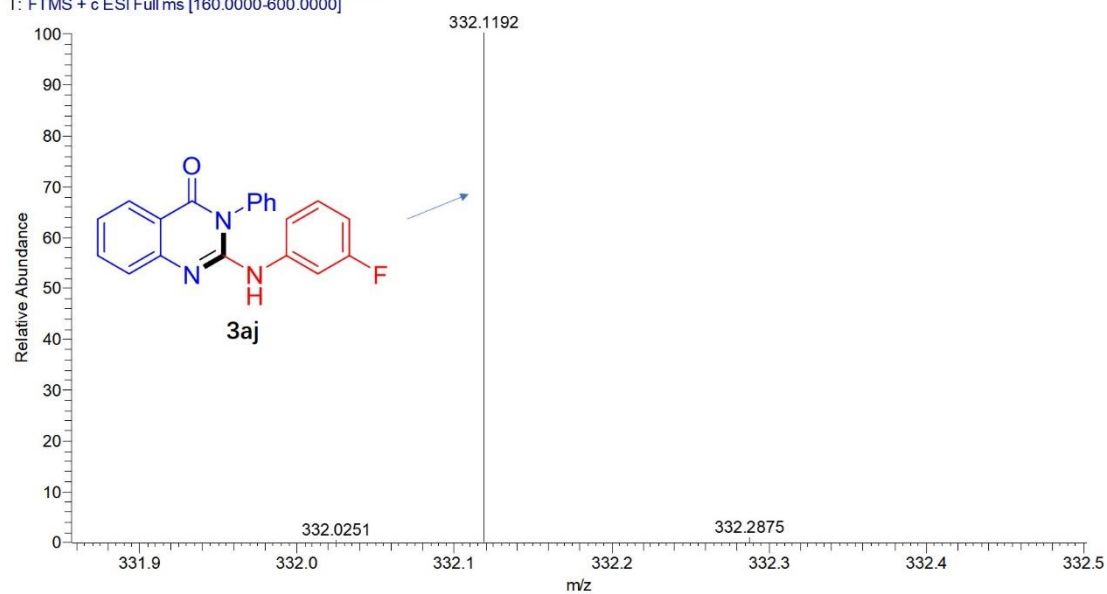

1212-2-HPL+ #2815 RT: 5.57 AV: 1 NL: 5.32E8  
T: FTMS + c ESI Full ms [160.0000-600.0000]

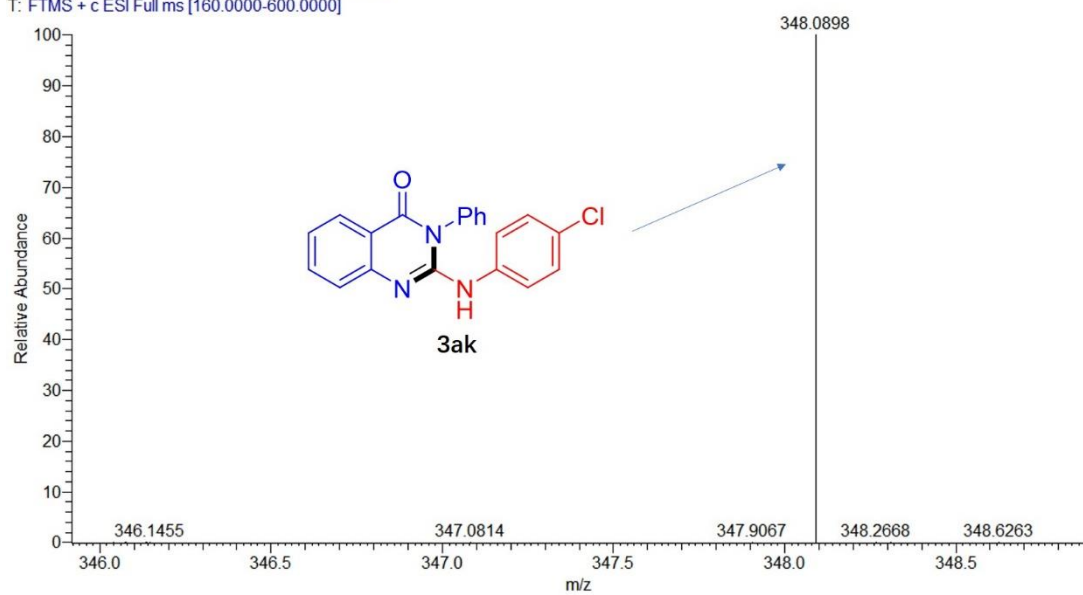

1212-2-HPL+ #2815 RT: 5.57 AV: 1 NL: 8.54E6  
T: FTMS + c ESI Full ms [160.0000-600.0000]

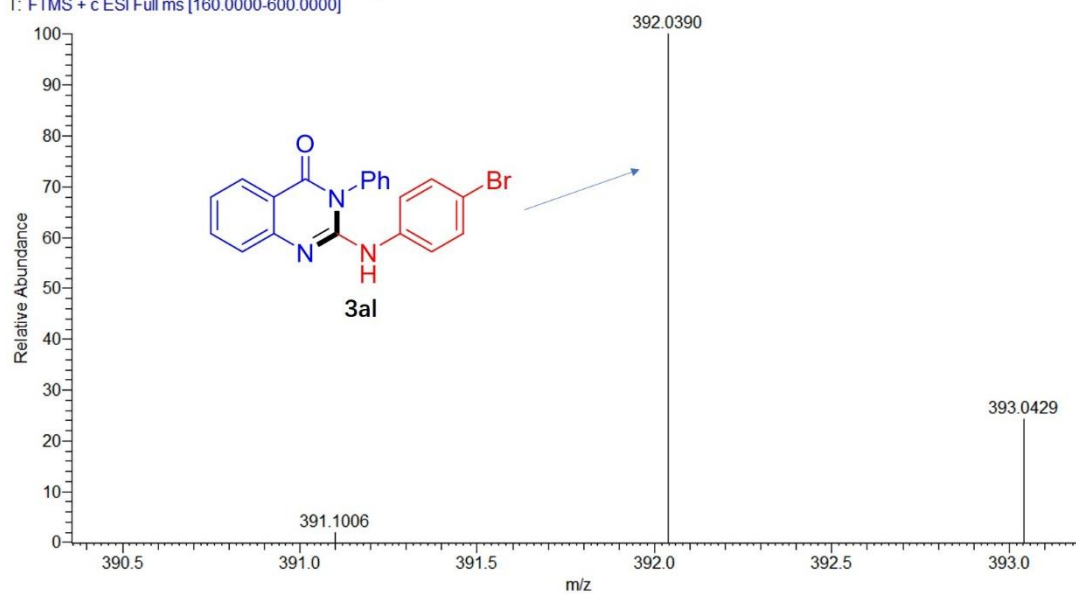

1212-2-HPL+ #2743 RT: 5.43 AV: 1 NL: 1.08E8  
T: FTMS + c ESI Full ms [160.0000-600.0000]

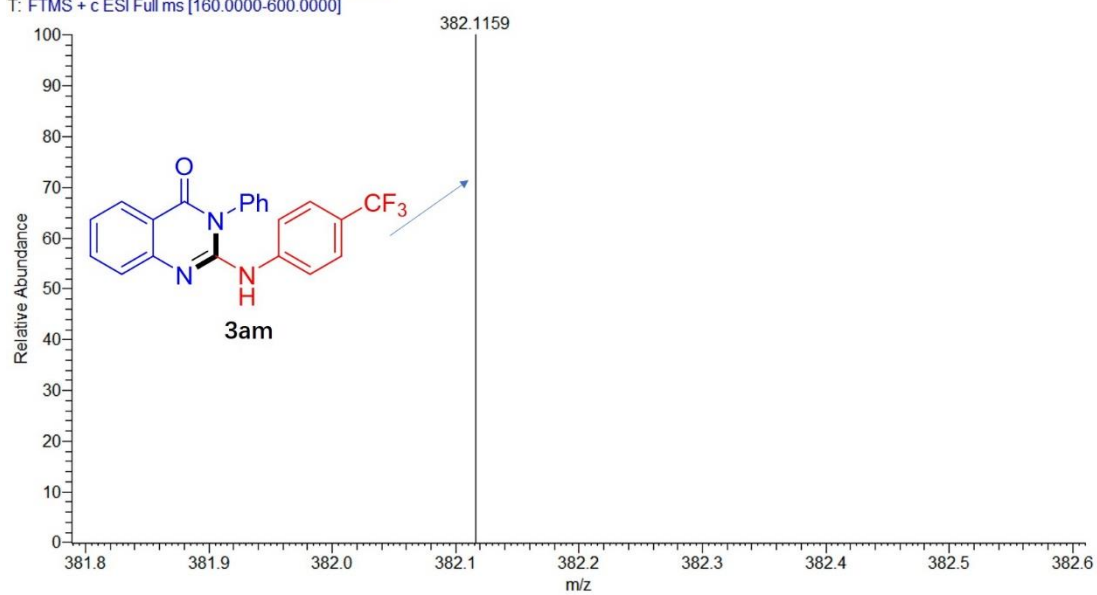

1212-2-HPL+ #2815 RT: 5.57 AV: 1 NL: 1.81E7  
T: FTMS + c ESI Full ms [160.0000-600.0000]

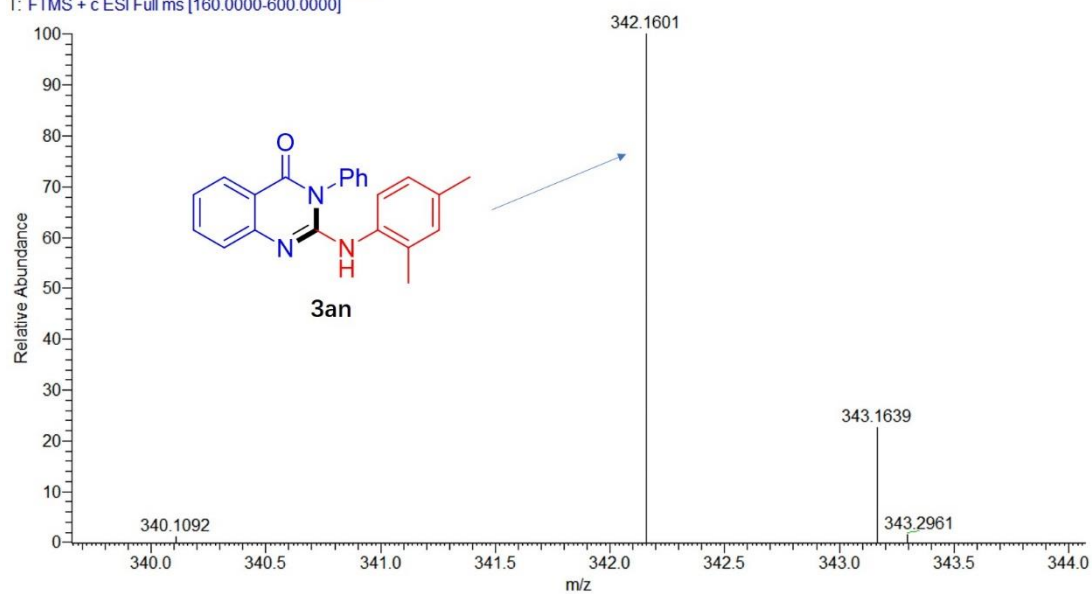

1212-2-HPL+ #3067 RT: 6.07 AV: 1 NL: 3.71E6  
T: FTMS + c ESI Full ms [160.0000-600.0000]

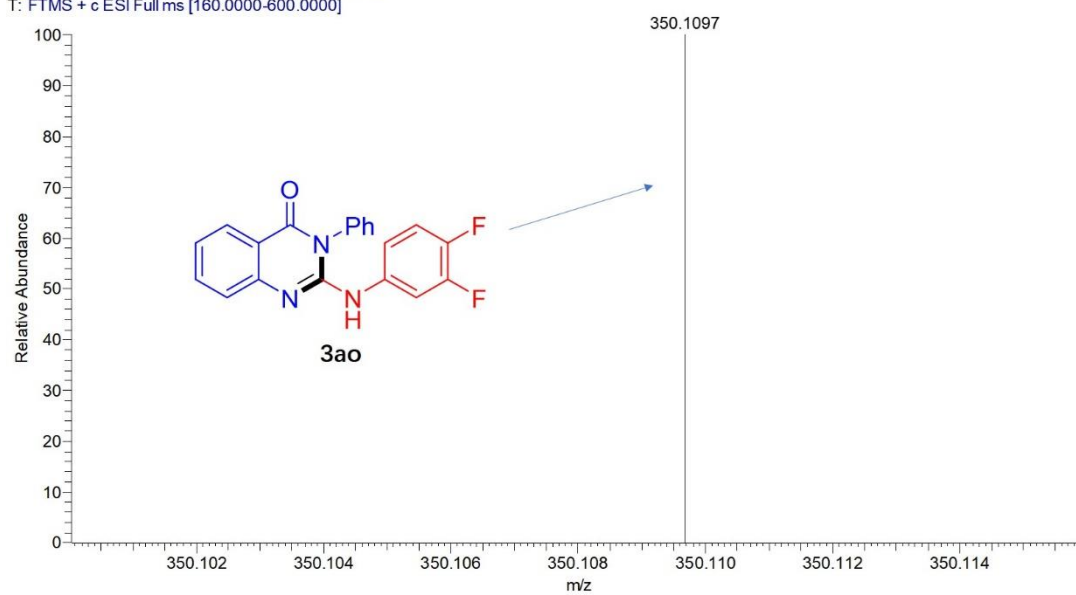



1212-2-HPL+ #3097 RT: 6.12 AV: 1 NL: 2.36E6  
T: FTMS + c ESI Full ms [160.0000-600.0000]

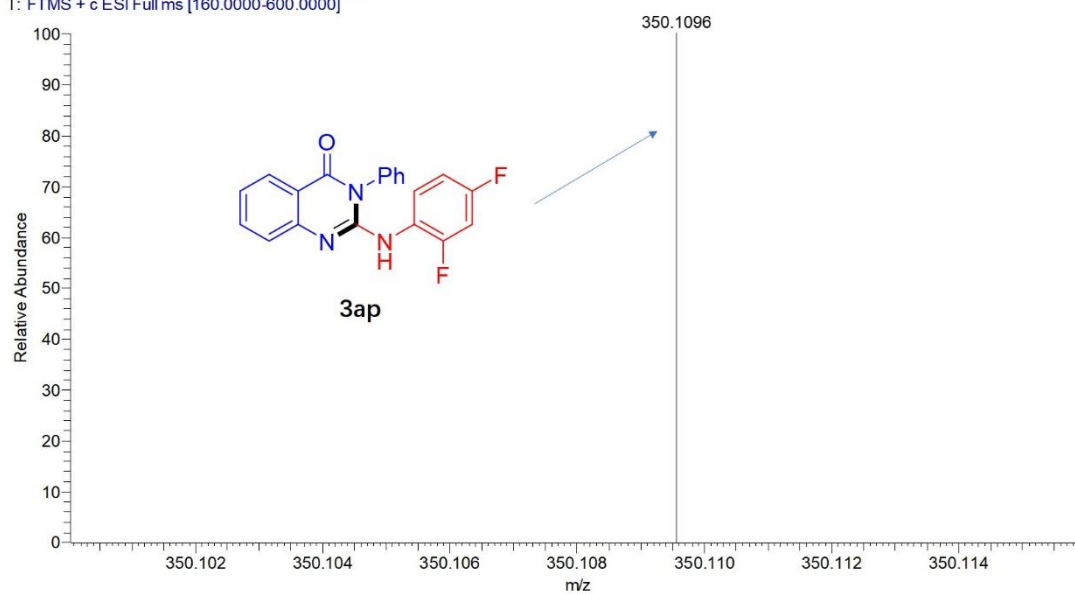

1212-2-HPL+ #3067 RT: 6.07 AV: 1 NL: 2.83E7  
T: FTMS + c ESI Full ms [160.0000-600.0000]

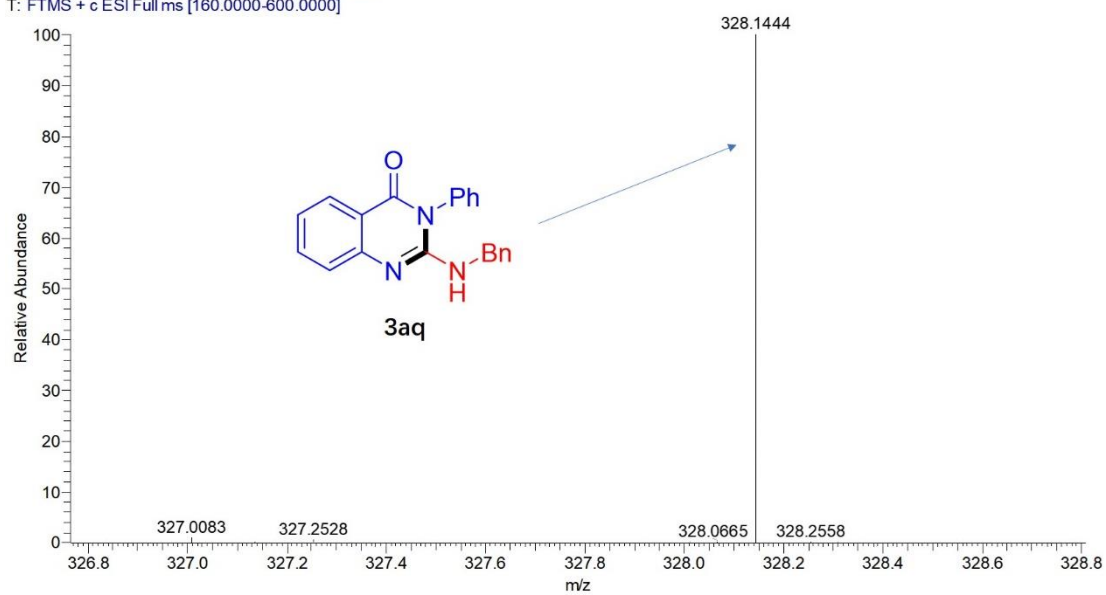

1212-2-HPL+ #3067 RT: 6.07 AV: 1 NL: 4.44E6  
T: FTMS + c ESI Full ms [160.0000-600.0000]

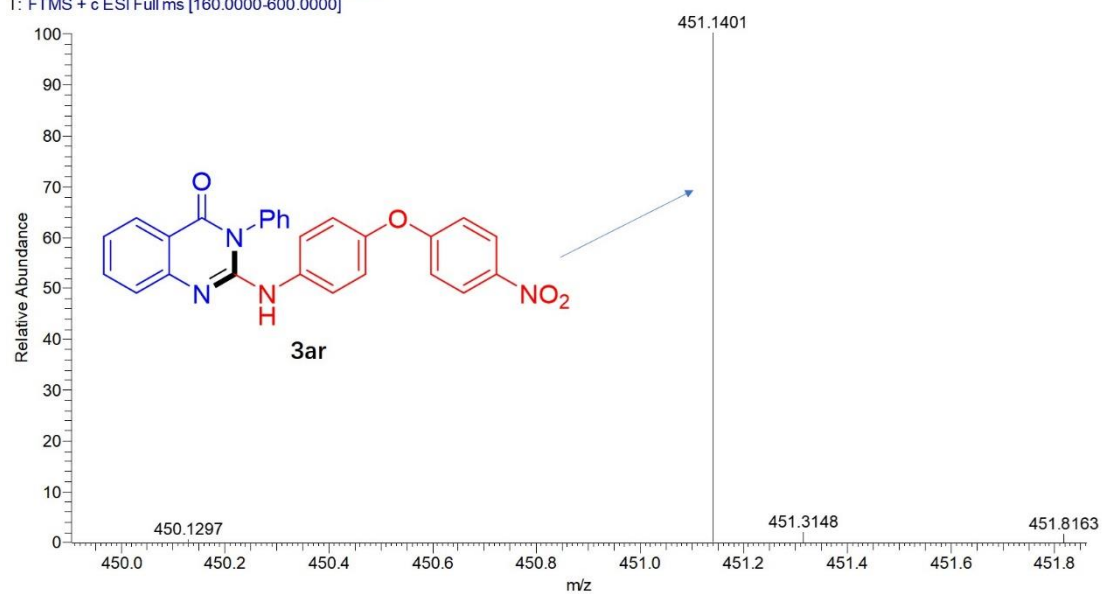

Supplement: d5ob00410a1.pdf [file d5ob00410a1.pdf]
